# Supplementary material for: Adipocyte-Specific Laminin Alpha 4 Deletion Preserves Adipose Tissue Health despite Increasing Adiposity
Source: MDPI journal article supplement (doi:10.3390/biomedicines10092077), 2022-08-25
Supplement: s1 [file s1]

Supplementary Figure S1

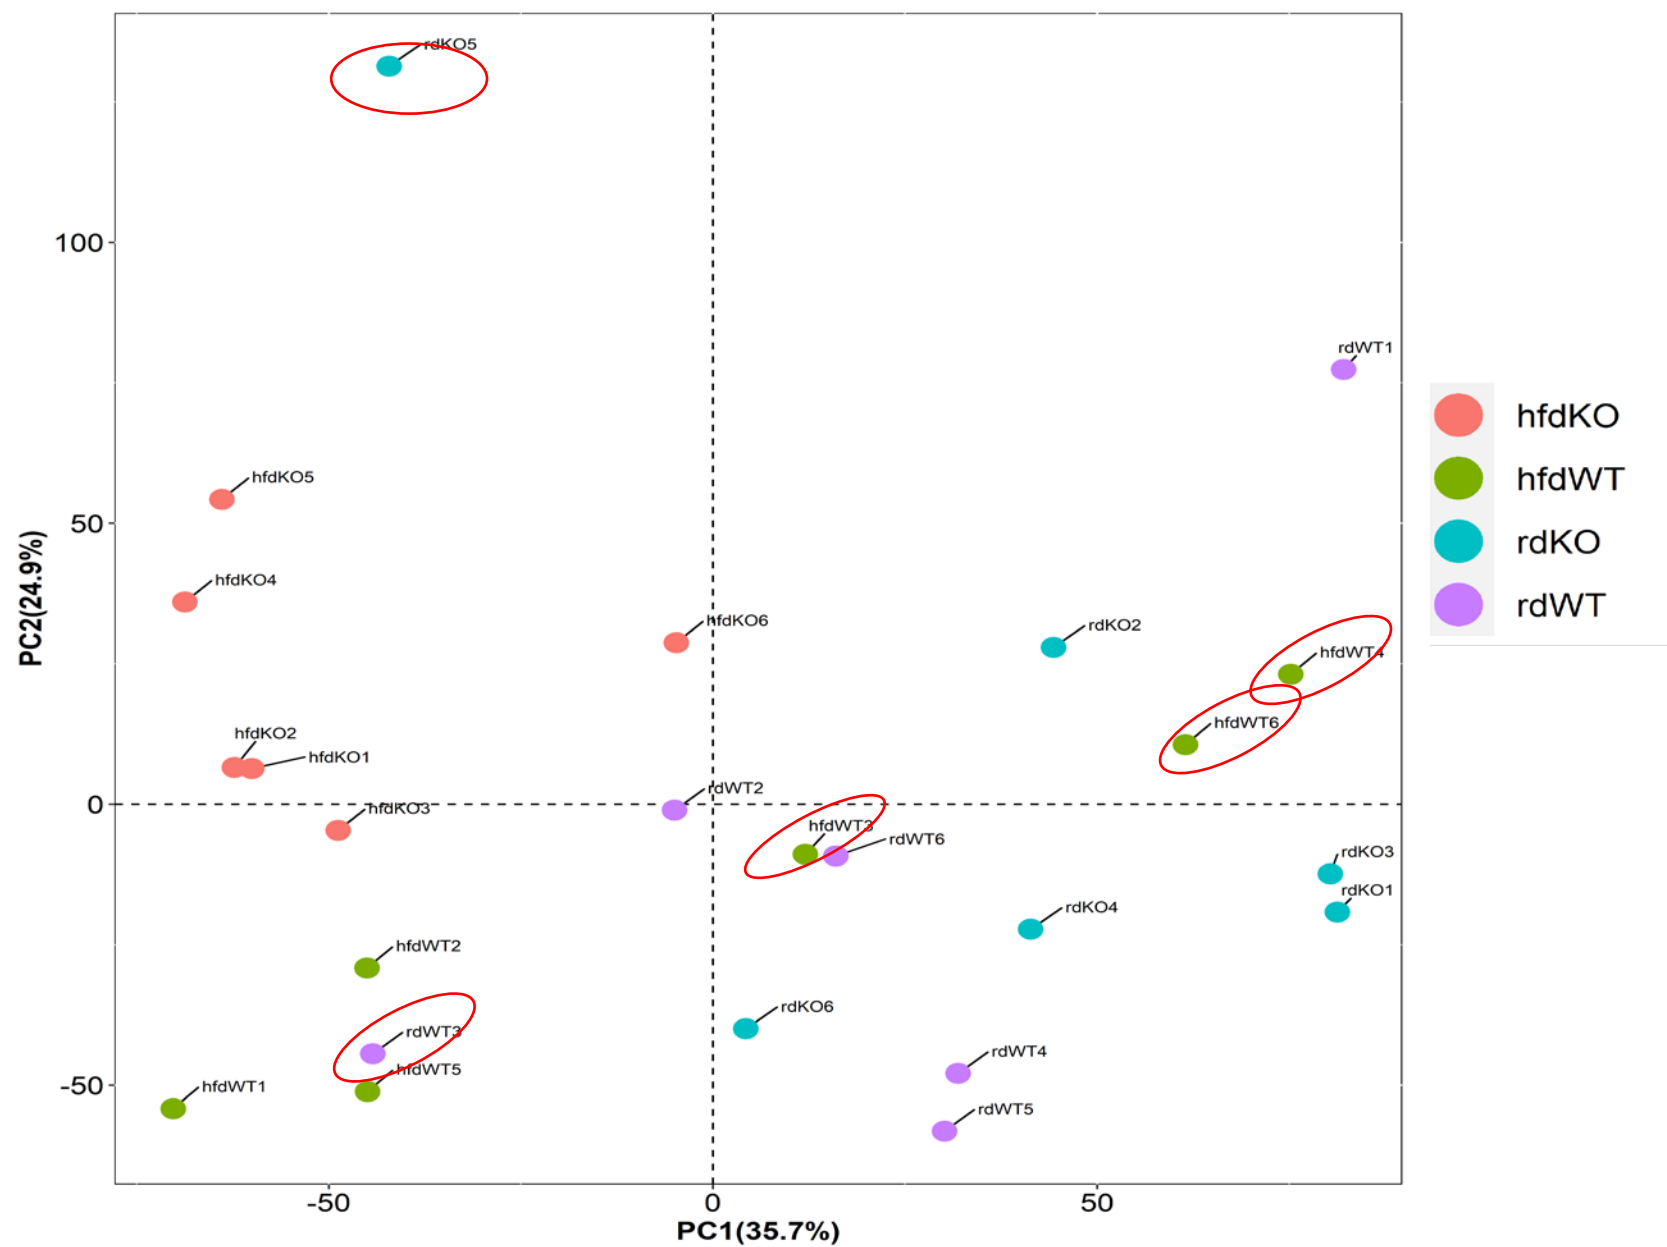

# Supplementary Figure S2

## Human White Adipose Tissue

Nuclei Clustering

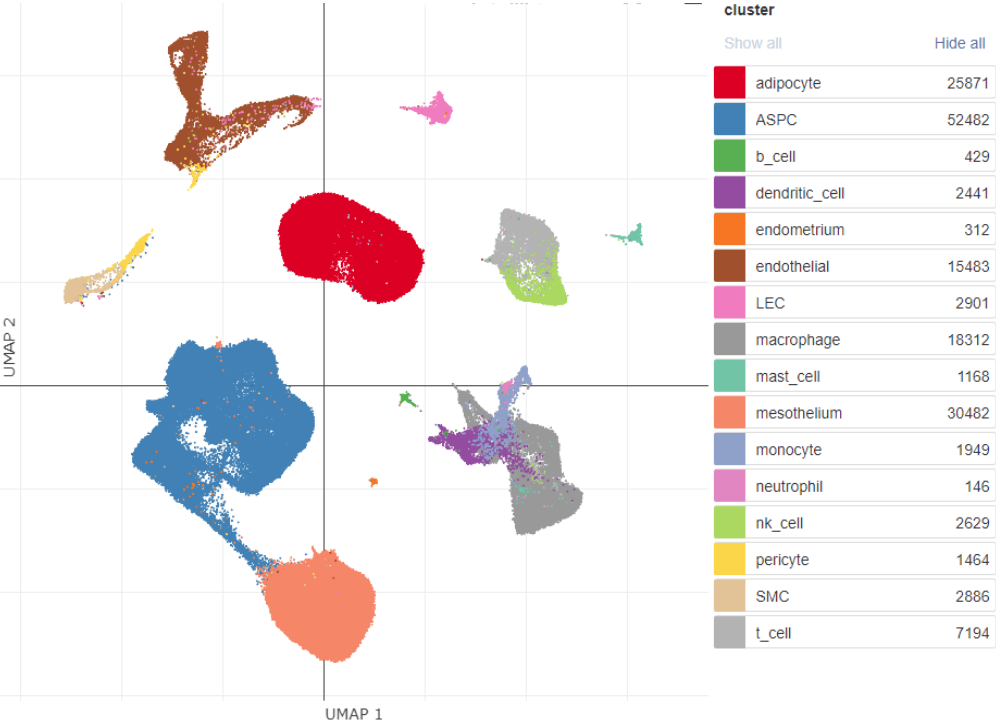

LAMA4 Expression

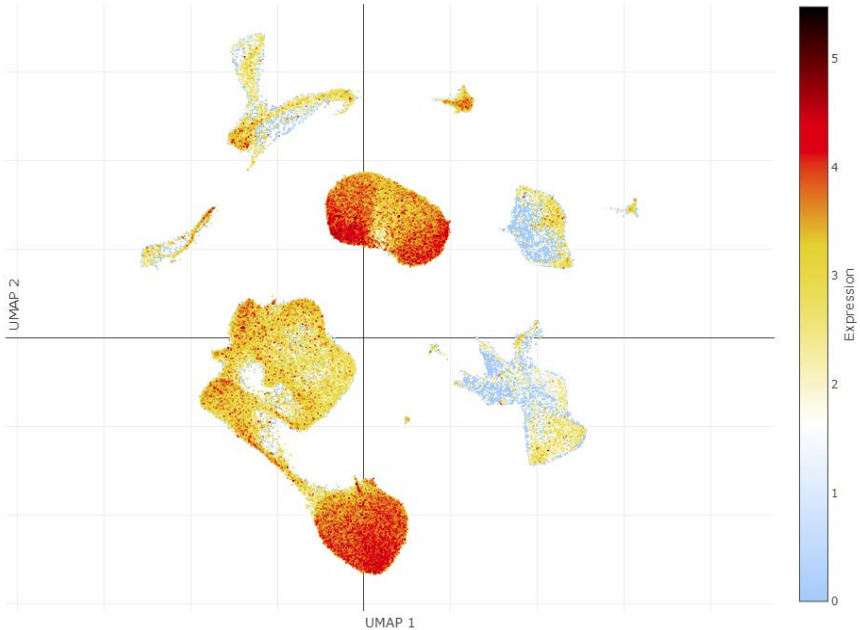

# Supplementary Figure S3

## Mouse White Adipose Tissue

Nuclei Clustering

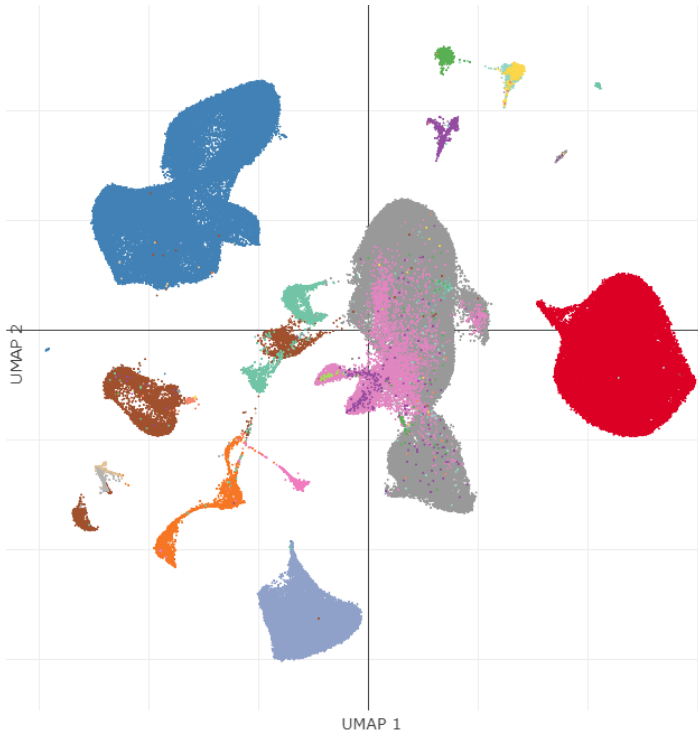

| cluster           |          |  |
|-------------------|----------|--|
| Show all          | Hide all |  |
| adipocyte         | 39934    |  |
| ASPC              | 51227    |  |
| b_cell            | 1202     |  |
| dendritic_cell    | 1572     |  |
| endothelial       | 5596     |  |
| female_epithelial | 9587     |  |
| LEC               | 1176     |  |
| macrophage        | 57848    |  |
| male_epithelial   | 3847     |  |
| mast_cell         | 311      |  |
| mesothelium       | 14947    |  |
| monocyte          | 7607     |  |
| neutrophil        | 47       |  |
| nk_cell           | 674      |  |
| pericyte          | 597      |  |
| SMC               | 263      |  |
| t_cell            | 1286     |  |

*Lama4* Expression

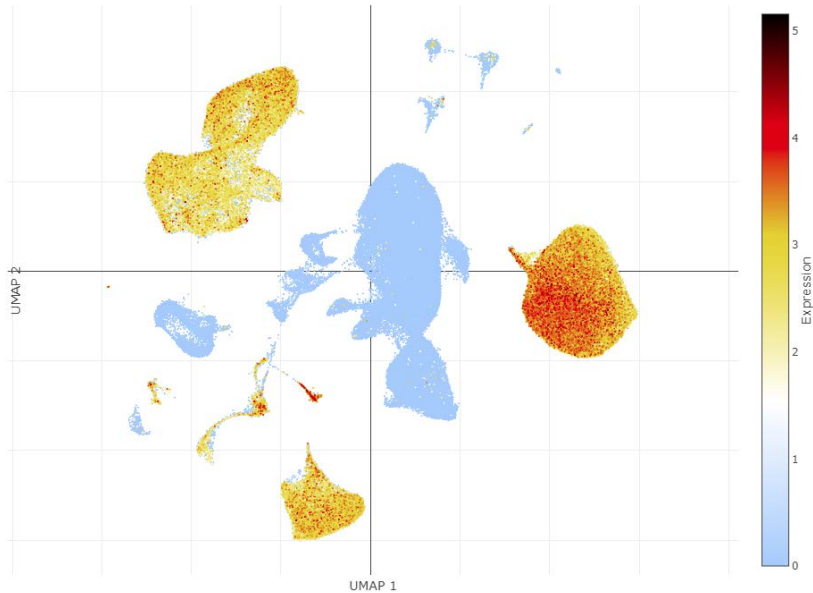

Supplementary Figure S4a

Expression (log2CPM)

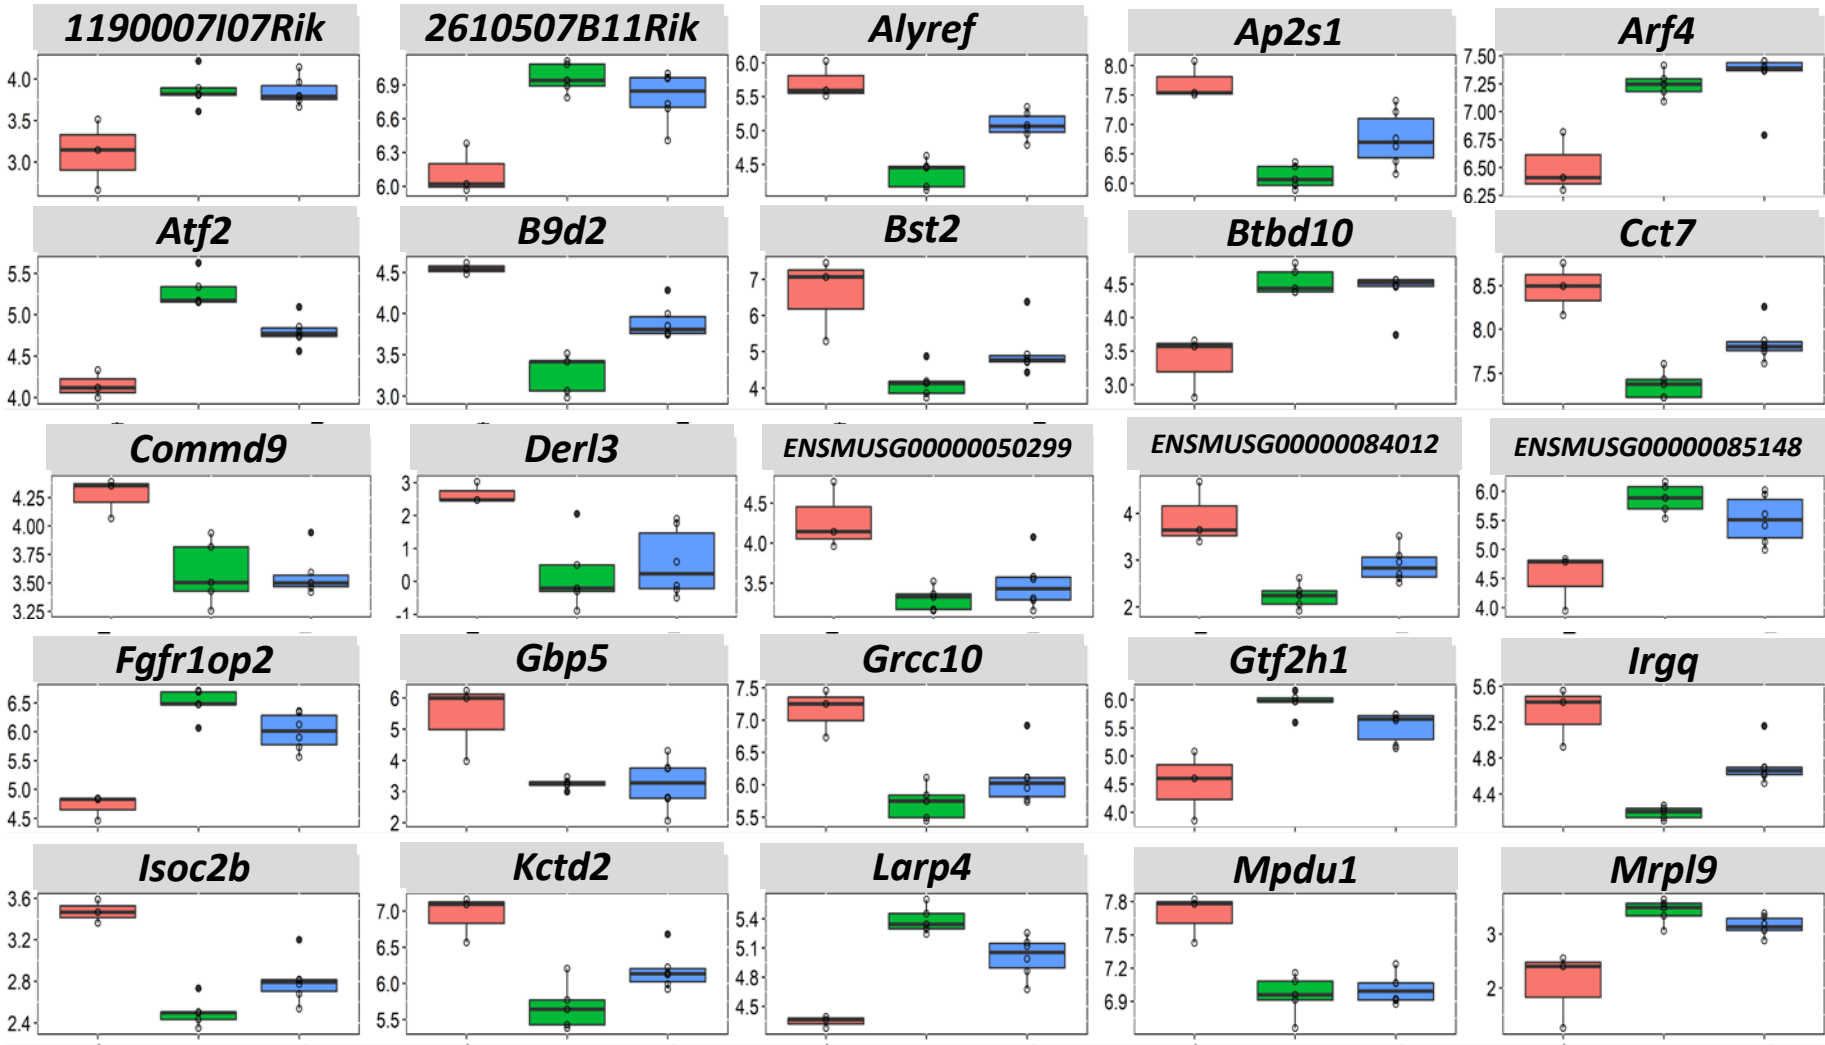

Treatment Group

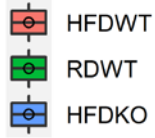

Supplementary Figure S4b

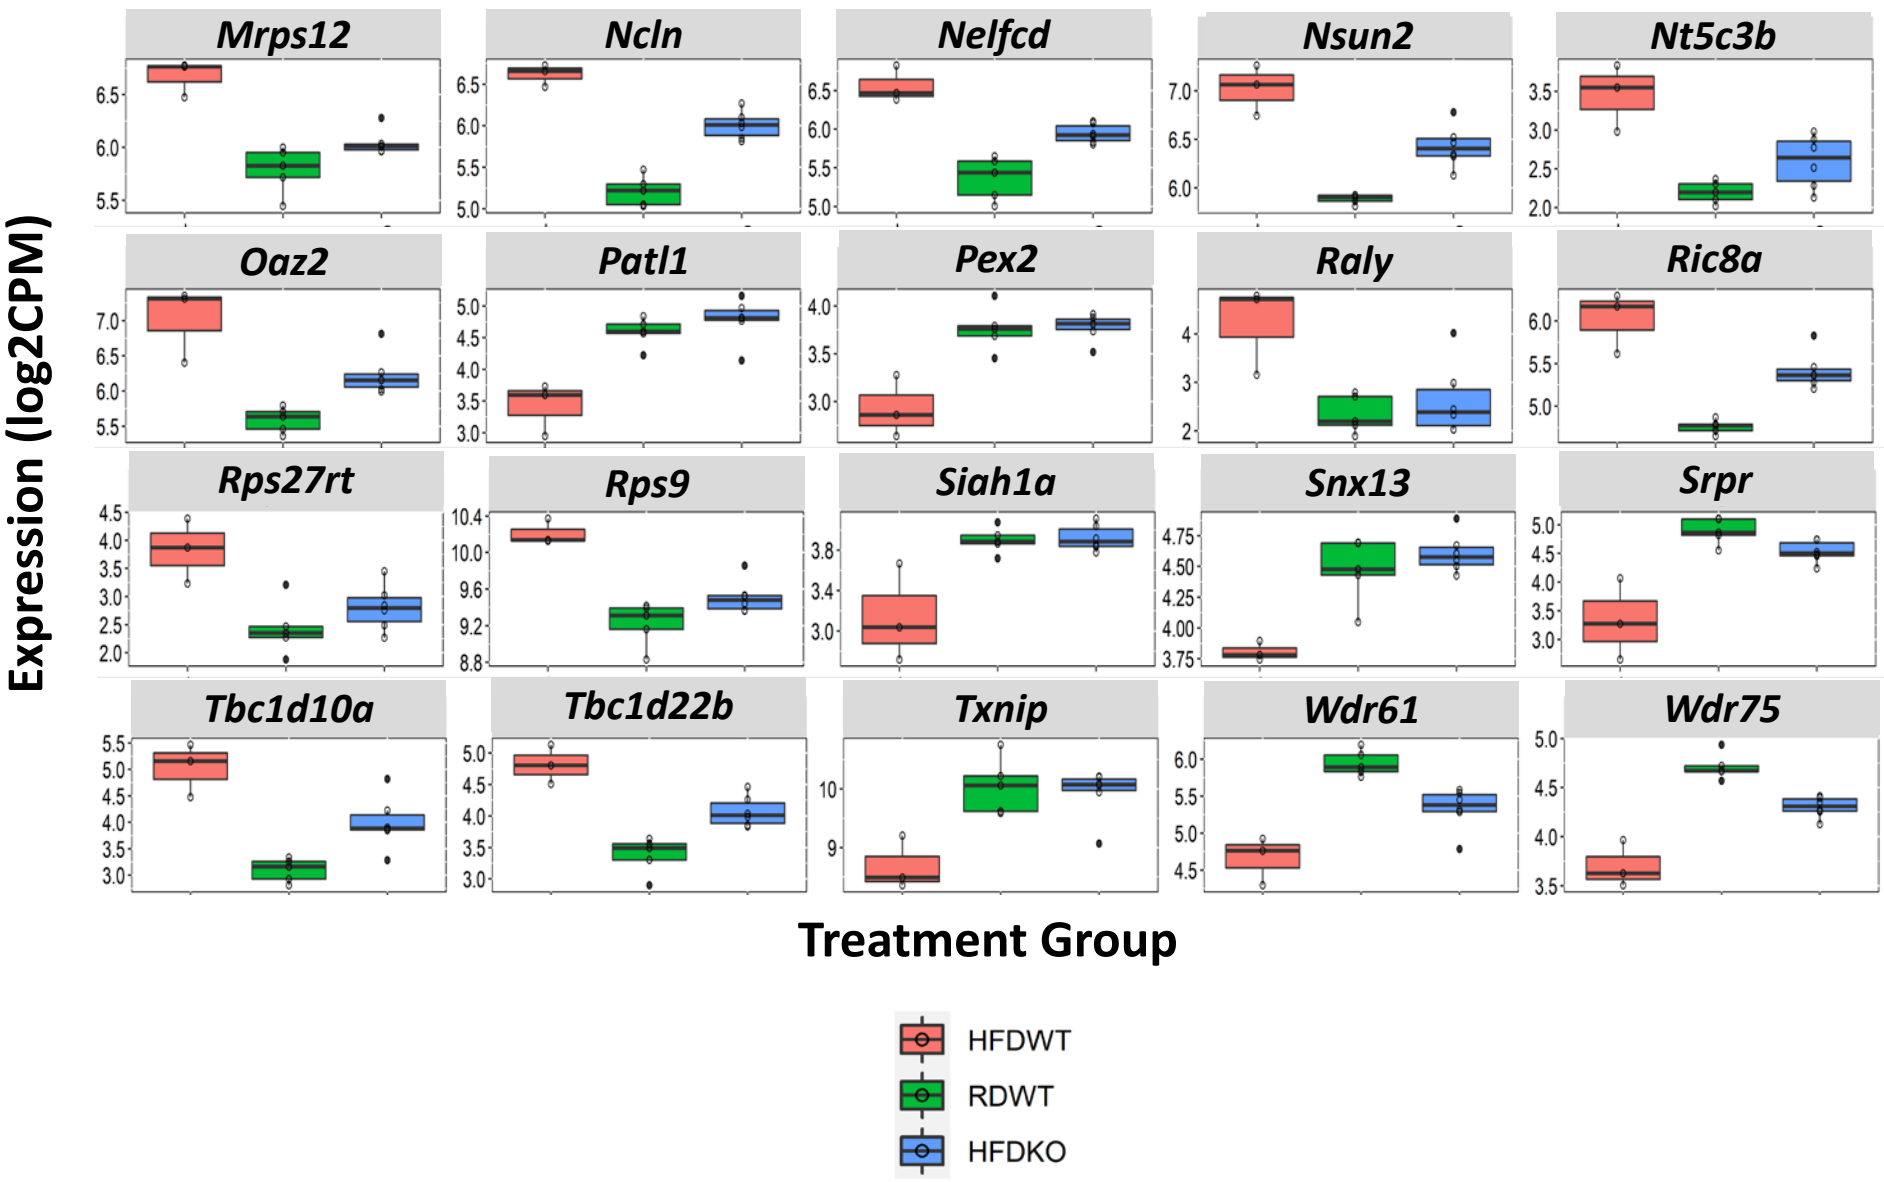

# Supplementary Table S1

| gene          | Function                                                                                                       | peroxisome | ribosome | protein targeting | DNA damage | RNA regulation | G-protein regulation | protein regulation |
|---------------|----------------------------------------------------------------------------------------------------------------|------------|----------|-------------------|------------|----------------|----------------------|--------------------|
| Fgfr1op2      | wound healing                                                                                                  |            |          |                   |            |                |                      |                    |
| Larp4         | regulation of mRNA translation, associates with ribosomal subunit                                              |            |          |                   |            |                |                      |                    |
| Srpr          | nascent protein targeting to ER                                                                                |            |          |                   |            |                |                      |                    |
| Btbd10        | Akt activation via inhibition of dephosphorylation by PPP2CA                                                   |            |          |                   |            |                |                      |                    |
| Pex2          | Peroxisome biogenesis                                                                                          |            |          |                   |            |                |                      |                    |
| Grcc10        | required for corpus callosum development                                                                       |            |          |                   |            |                |                      |                    |
| Gt2h1         | general and transcription-coupled nucleotide excision repair of damaged DNA                                    |            |          |                   |            |                |                      |                    |
| 2610507B11Rik | unknown function                                                                                               |            |          |                   |            |                |                      |                    |
| Mrpl9         | mitochondrial ribosome component, associated with peroxisome biogenesis disorder                               |            |          |                   |            |                |                      |                    |
| Atf2          | transcriptional activator of genes involved in anti-apoptosis, cell growth and DNA-damage response             |            |          |                   |            |                |                      |                    |
| Ncln          | ribosome-associated translocon complex component, regulation of protein complex stability                      |            |          |                   |            |                |                      |                    |
| Tbc1d22b      | GTPase activating protein for Rab family proteins, intracellular protein transport                             |            |          |                   |            |                |                      |                    |
| Mrps12        | component of ribosome                                                                                          |            |          |                   |            |                |                      |                    |
| B9d2          | regulation of cilogenesis                                                                                      |            |          |                   |            |                |                      |                    |
| Mpdu1         | regulation of lipid-linked oligosaccharides and glycosylphosphatidylinositol synthesis                         |            |          |                   |            |                |                      |                    |
| Tbc1d10a      | GTPase activating protein for Rab27A, retrograde protein transport from endosome to Golgi                      |            |          |                   |            |                |                      |                    |
| Nsun2         | methylation of cytosine to promote TRNA stability and prevent MRNA decay                                       |            |          |                   |            |                |                      |                    |
| Nt5c3b        | involved in exonucleolytic catabolism of deadenylated MRNA                                                     |            |          |                   |            |                |                      |                    |
| Ric8a         | G-alpha protein activator, regulation of GPCR activity including basement membrane organization                |            |          |                   |            |                |                      |                    |
| Irgq          | GTP binding activity                                                                                           |            |          |                   |            |                |                      |                    |
| Snx13         | regulation of G protein signaling, involved in intracellular trafficking                                       |            |          |                   |            |                |                      |                    |
| Alyref        | nuclear located molecular chaperone, regulation of BZIP proteins, nuclear export of MRNA                       |            |          |                   |            |                |                      |                    |
| NA            | unknown function                                                                                               |            |          |                   |            |                |                      |                    |
| Rps9          | ribosomal protein, component of 40S subunit                                                                    |            |          |                   |            |                |                      |                    |
| Isoc2b        | involved in protein stabilization                                                                              |            |          |                   |            |                |                      |                    |
| Comm9         | involved in sodium ion transport, act upstream of or within cholesterol homeostasis, NFkB regulation           |            |          |                   |            |                |                      |                    |
| Cct7          | molecular chaperone, part of TCP1 complex, involved in folding of nascent proteins including actin and tubulin |            |          |                   |            |                |                      |                    |
| Derf3         | degradation of misfolded glycoproteins in ER, functional component of ERAD                                     |            |          |                   |            |                |                      |                    |
| NA            | unknown function                                                                                               |            |          |                   |            |                |                      |                    |
| Kctd2         | involved in proteasome mediated protein catabolism                                                             |            |          |                   |            |                |                      |                    |
| Txnip         | inhibitor of thioredoxin, regulation of cellular redox signaling and oxidative stress and ER stress            |            |          |                   |            |                |                      |                    |
| Wdr75         | RNA binding, regulation of ribosomal RNA processing and RNAPOL1 transcription                                  |            |          |                   |            |                |                      |                    |
| Raly          | RNA binding protein, transcriptional cofactor of cholesterol biosynthetic genes in liver                       |            |          |                   |            |                |                      |                    |
| Nelfc4        | repressor of RNAPol II mediated transcriptional elongation, component of NELF complex                          |            |          |                   |            |                |                      |                    |
| Ap2s1         | clathrin associated, involved in protein transport                                                             |            |          |                   |            |                |                      |                    |
| NA            | lncRNA, unknown function                                                                                       |            |          |                   |            |                |                      |                    |
| Oaz2          | negative regulator of ornithine decarboxylase activity and intracellular polyamine biosynthesis                |            |          |                   |            |                |                      |                    |
| Wdr61         | component of PAF and SKI complexes, transcriptional regulation including RNA surveillance                      |            |          |                   |            |                |                      |                    |
| Bst2          | antiviral activity via tethering nascent virions to infected cell membranes                                    |            |          |                   |            |                |                      |                    |
| Rps27rt       | component of 40S ribosome, regulation of rRNA processing                                                       |            |          |                   |            |                |                      |                    |
| Gbp5          | component of TRAFAC class GTPases, activator of NLRP3 inflammasome assembly                                    |            |          |                   |            |                |                      |                    |
| Pat1          | RNA binding protein involved in deadenylation-dependent decapping of mRNAs leading to their degradation        |            |          |                   |            |                |                      |                    |
| Siah1a        | E3 ligase mediates ubiquitination and proteosomal degradation of target proteins                               |            |          |                   |            |                |                      |                    |
| 1190007J07Rik | unknown function                                                                                               |            |          |                   |            |                |                      |                    |
| Arf4          | GTP-binding protein, activator of cholera toxin, involved in protein trafficking                               |            |          |                   |            |                |                      |                    |
